# Supplementary material
Source: PubMed Central journal article supplement (PMC3553748)

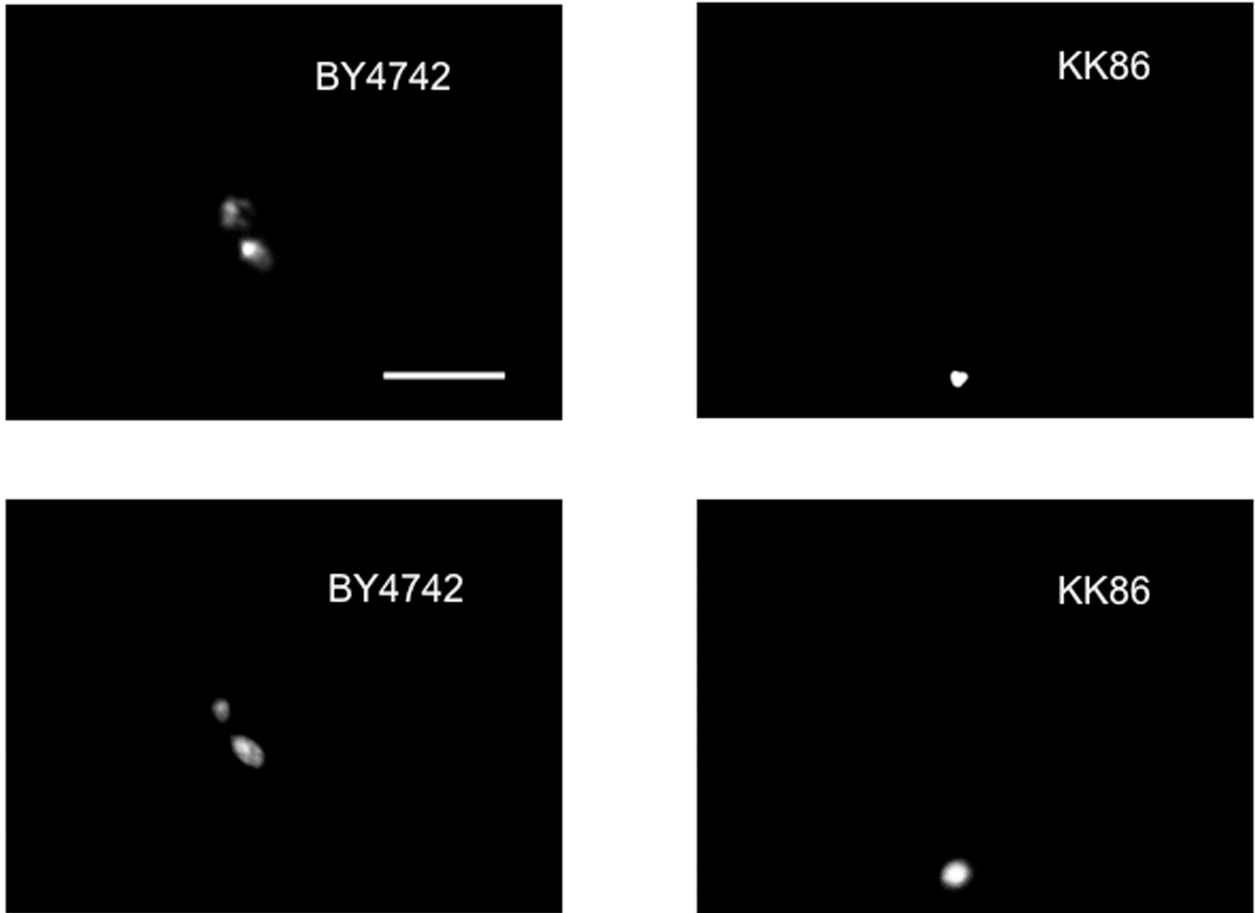

**Figure S1. DAPI-staining of AuTMAT-resistant mutants. Upper panels, DAPI fluorescence; lower panels, autofluorescence. BY4742 and KK86 are positive and negative controls for the presence of mitochondrial DNA, respectively. Reference bars, 10  $\mu$ m.**

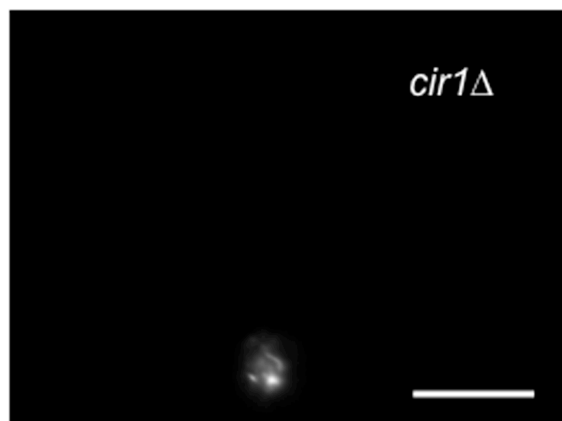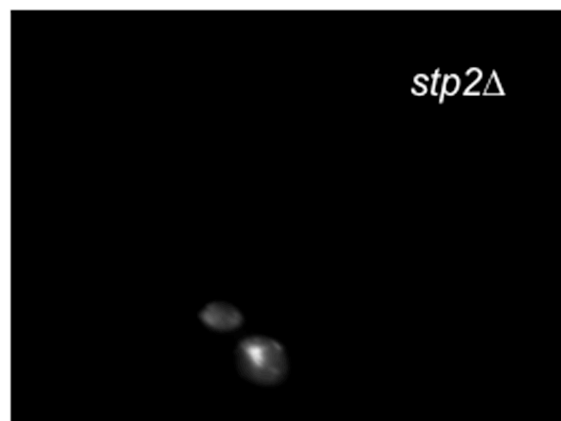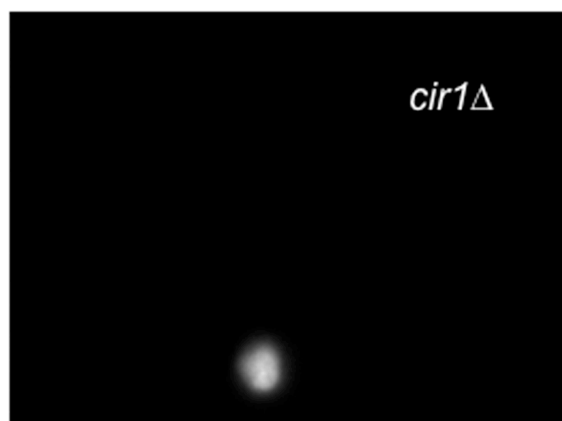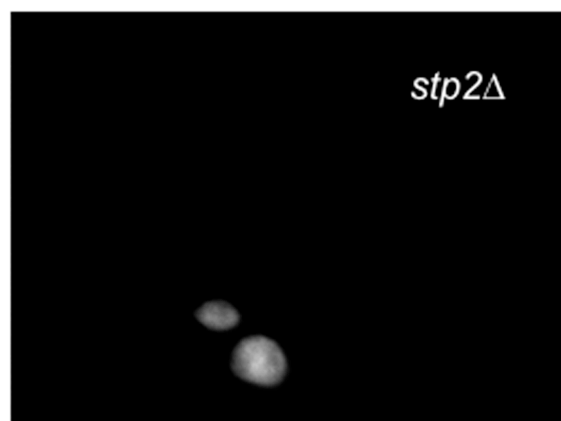

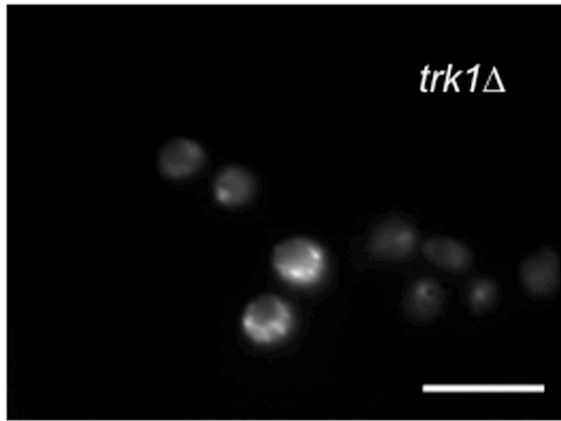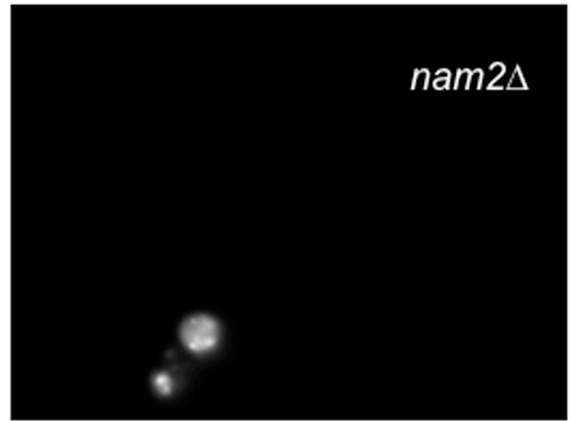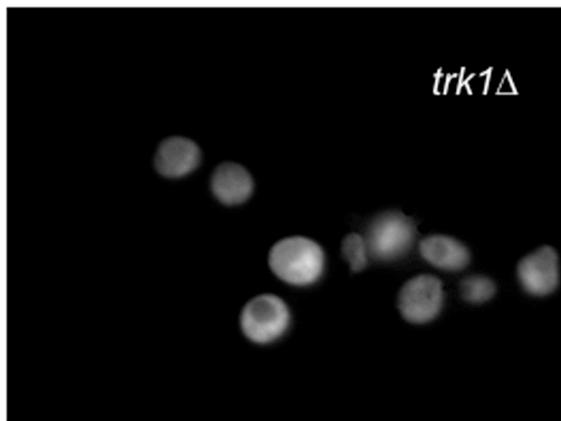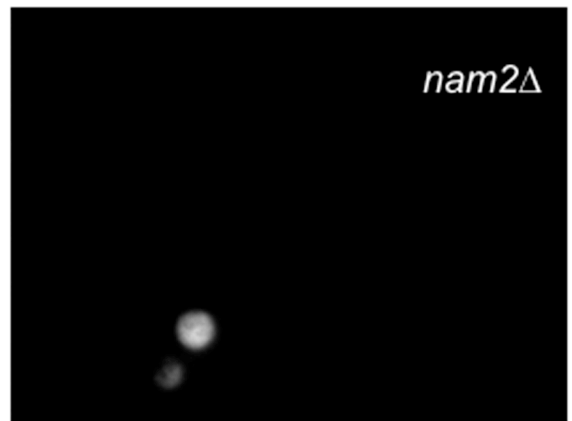

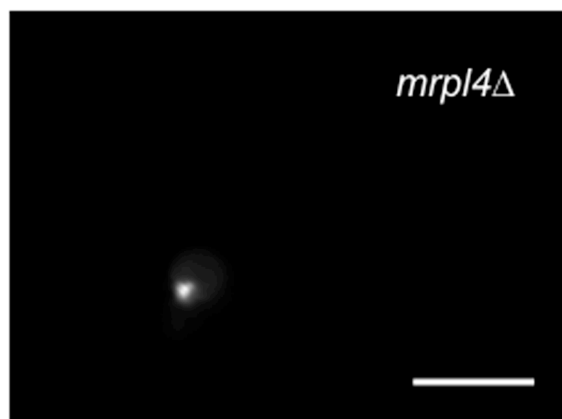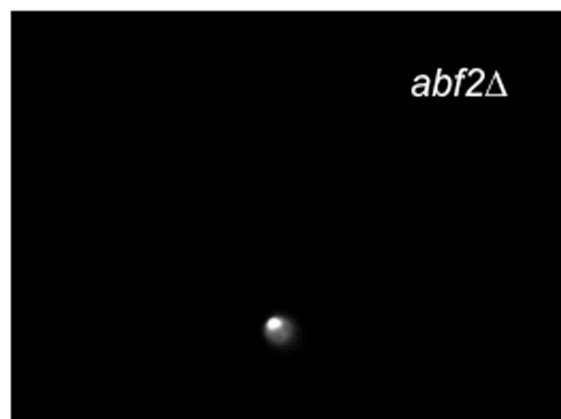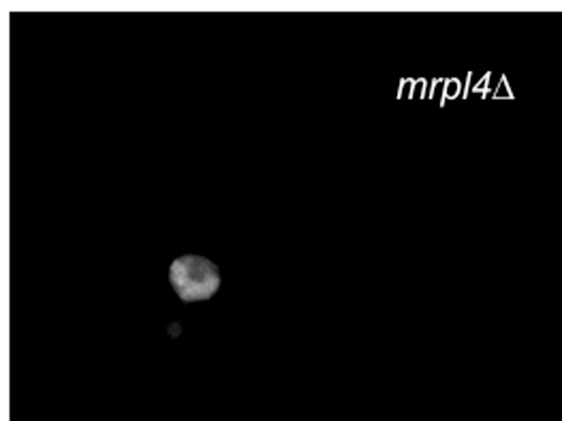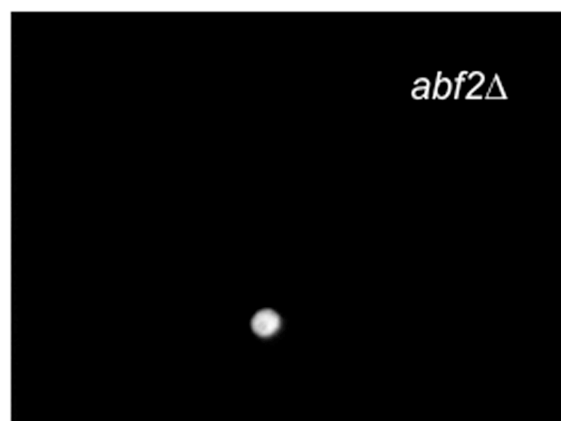

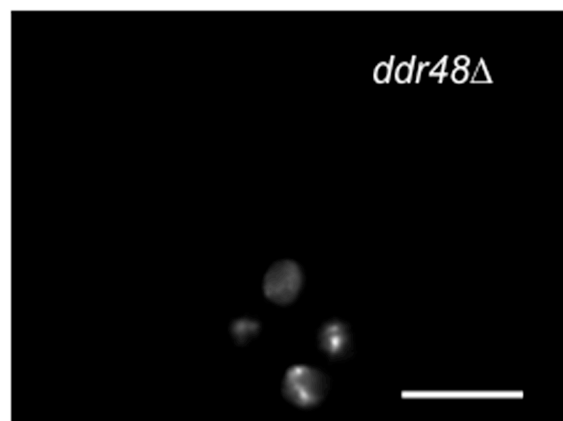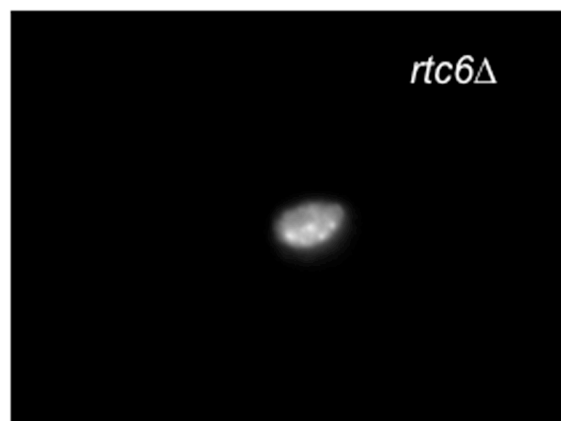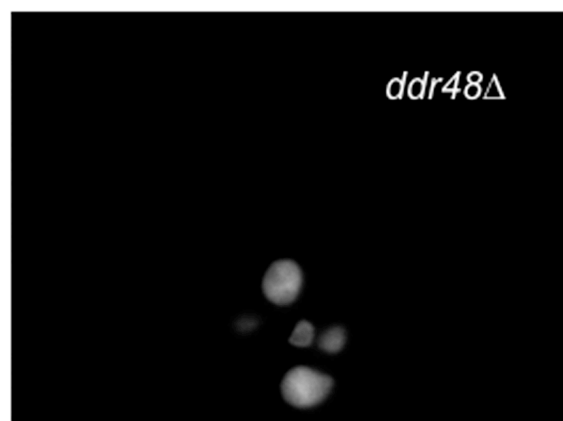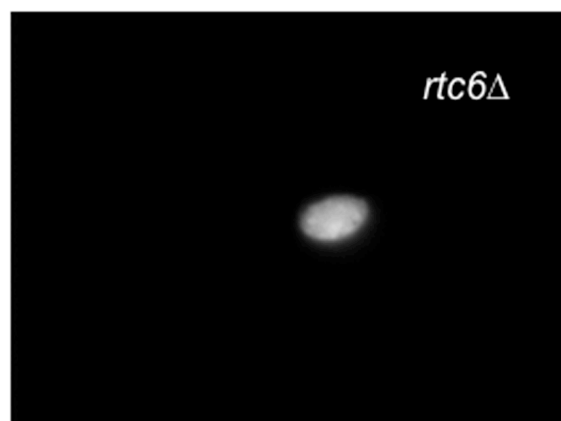

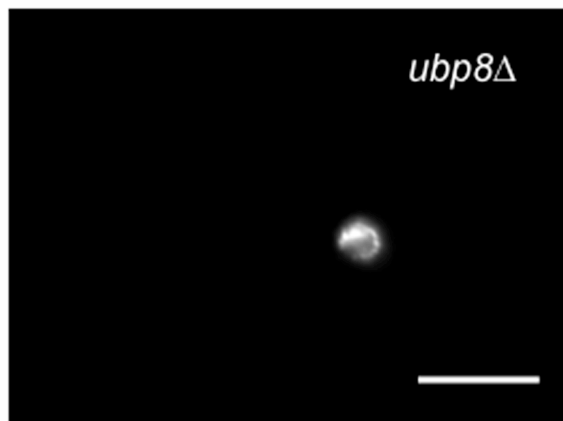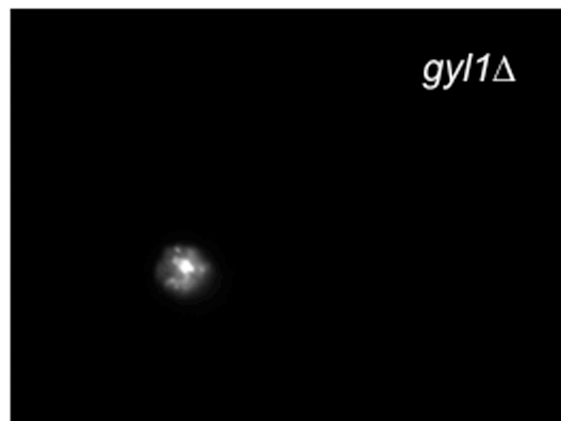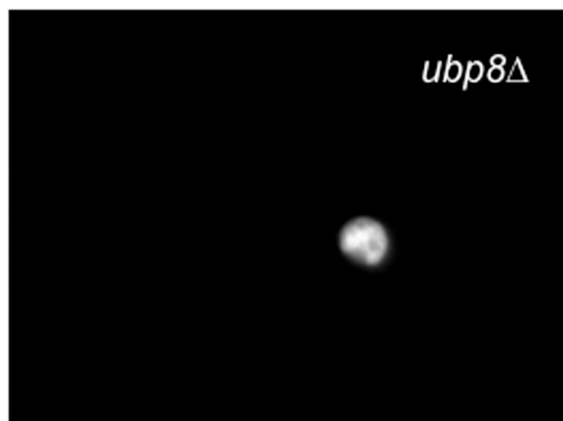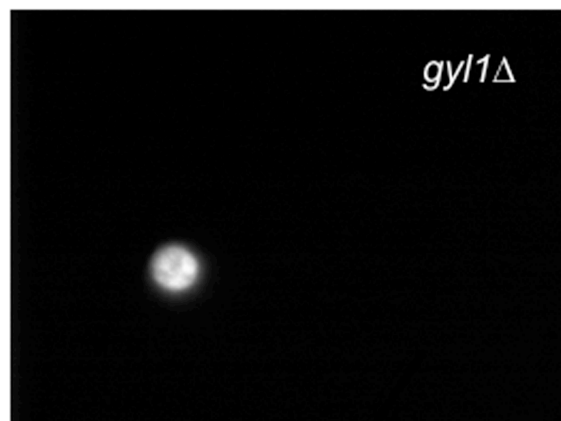

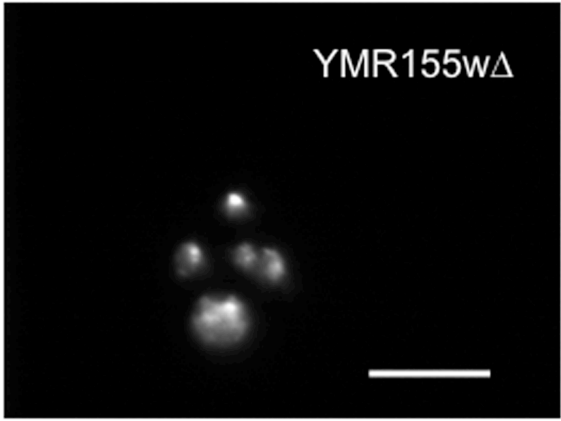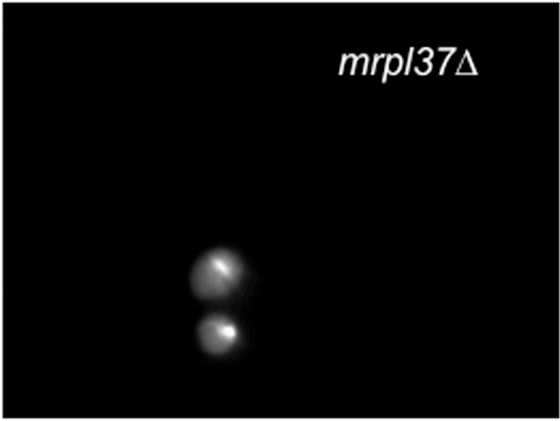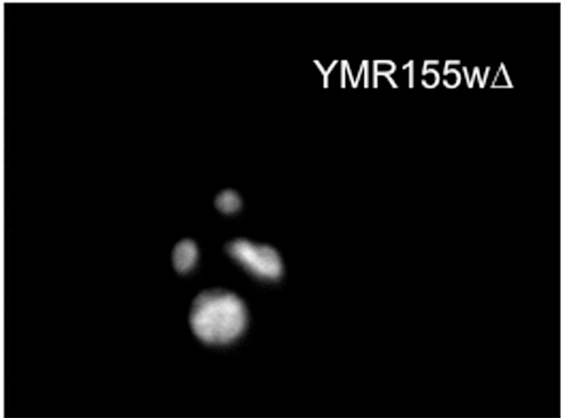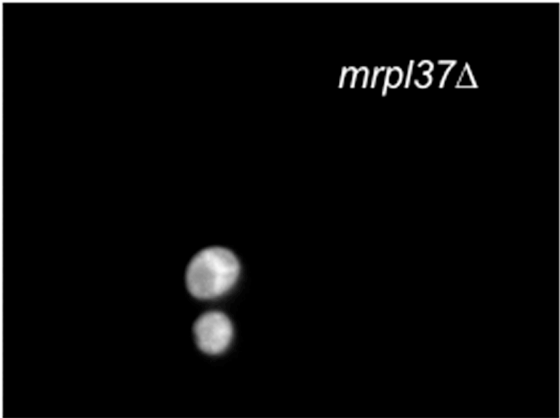

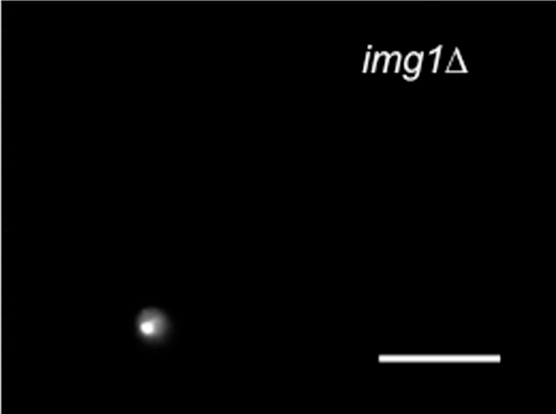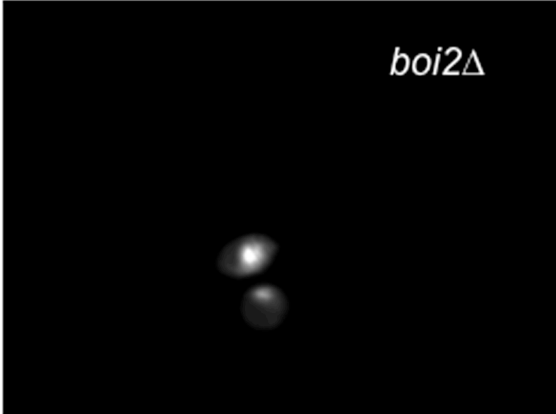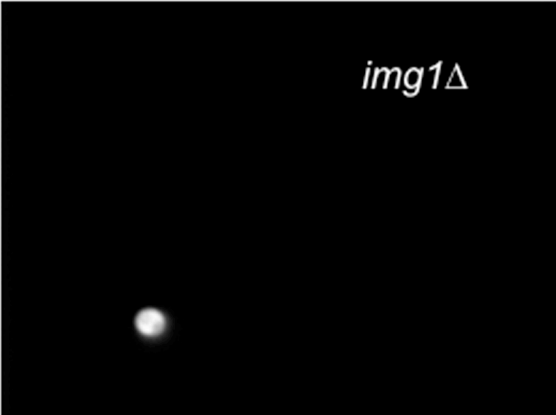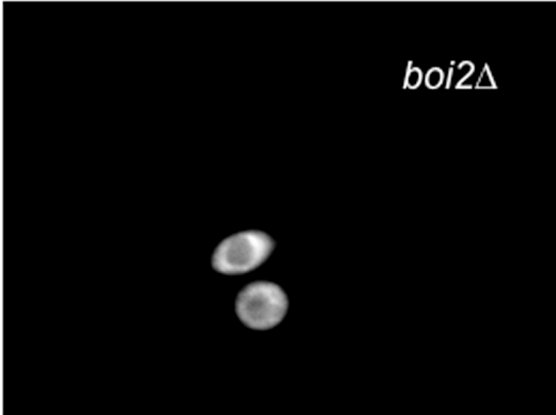



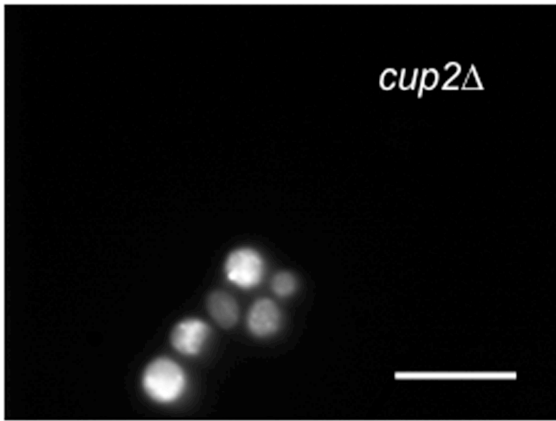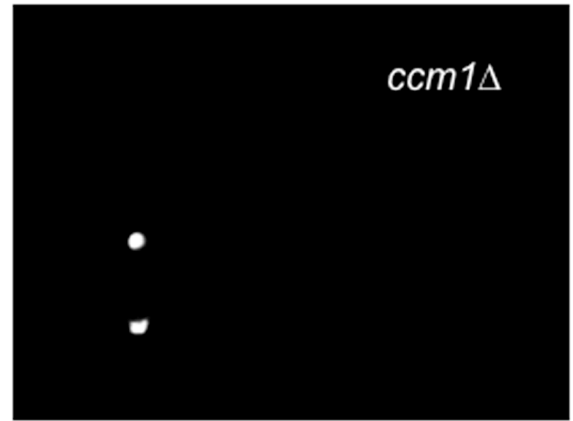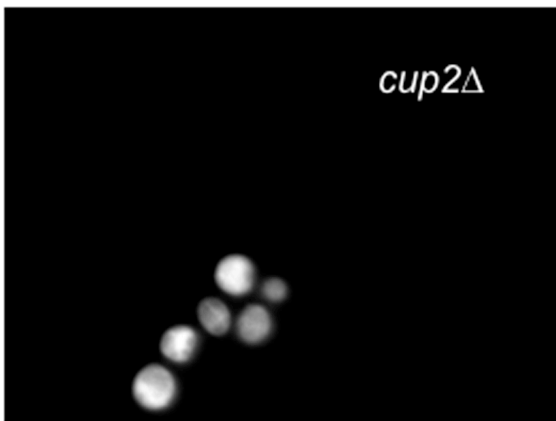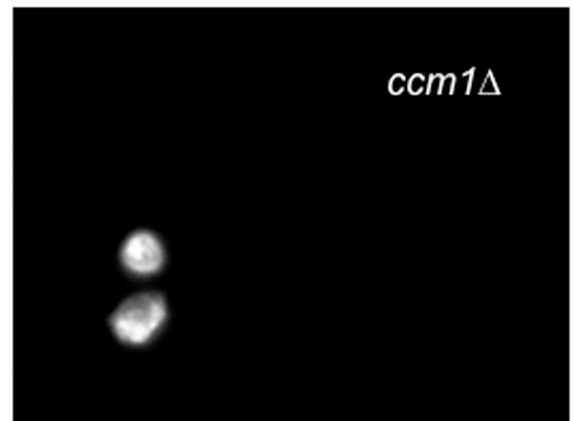

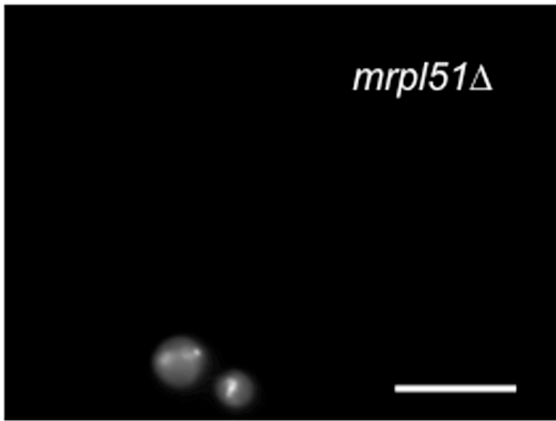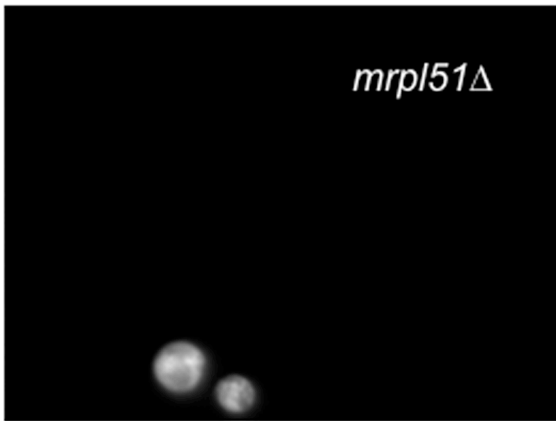

Supplement: AEM.01737-12_zam999104016so1.pdf [file AEM.01737-12_zam999104016so1.pdf]
