# Supplementary material
Source: PubMed Central journal article supplement (PMC3553748)
Supplement: AEM.01737-12_zam999104016so2.pdf [file AEM.01737-12_zam999104016so2.pdf]

- 1 **Supplementary Table S1.** Number of cells of DAPI-stained AuTMAT-resistant mutants
- 2 exhibiting mitochondrial DNA-negative (type A) and positive (type B) fluorescence<sup>a</sup>.

| Locus/strain                     | Deleted gene         | Type |    | Frequency of |
|----------------------------------|----------------------|------|----|--------------|
|                                  |                      | A    | B  | Type B       |
| BY4742                           |                      | 3    | 24 | .89          |
| KK86 ( <i>rho</i> <sup>o</sup> ) |                      | 17   | 0  | 0            |
| YBR268w                          | <b><i>MRPL37</i></b> | 8    | 4  | .33          |
| YCR046c                          | <b><i>IMG1</i></b>   | 8    | 8  | .50          |
| YER114c                          | <i>BOI2</i>          | 12   | 4  | .25          |
| YGL166w                          | <i>CUP2</i>          | 0    | 20 | 1.00         |
| YGR150c                          | <b><i>CCM1</i></b> * | 11   | 4  | .27          |
| YGR207c                          | <i>CIR1</i>          | 3    | 11 | .79          |
| YHR006w                          | <i>STP2</i>          | 3    | 13 | .81          |
| YJL129c                          | <i>TRK1</i>          | 3    | 11 | .79          |
| YLR382c                          | <b><i>NAM2</i></b>   | 8    | 6  | .43          |
| YLR439w                          | <b><i>MRPL4</i></b>  | 9    | 7  | .44          |
| YMR072w                          | <u><i>ABF2</i></u>   | 7    | 7  | .50          |
| YMR155w                          |                      | 5    | 13 | .72          |
| YMR173w                          | <i>DDR48</i>         | 5    | 13 | .72          |
| YMR192w                          | <i>GYL1</i>          | 5    | 10 | .67          |
| YMR223w                          | <i>UBP8</i>          | 3    | 13 | .81          |
| YPL183w-A                        | <b><i>RTC6</i></b> * | 1    | 11 | .92          |
| YPR100w                          | <b><i>MRPL51</i></b> | 11   | 7  | .39          |

3 <sup>a</sup> Type A: single spot of prominent fluorescence; type B: single spot of prominent  
4 fluorescence with weaker spots of fluorescence. Gene names in bold are those that  
5 encode products involved in mitochondrial protein synthesis. Asterisk indicates gene  
6 may play role in mitochondrial protein synthesis. Underlined gene name indicates role in  
7 mitochondrial genome replication and recombination. A total of 12-27 cells per strain  
8 were scored.
